# Supplementary material for: F-assisted synthesis of a hierarchical ZSM-5 zeolite for methanol to propylene reaction: a b-oriented thinner dimensional morphology
Source: Royal Society of Chemistry journal article supplement (doi:10.1039/c5ra09561a), 2015-01-01
Supplement: c5ra09561a1.pdf [file c5ra09561a1.pdf]

*Support Informantion*

**F-assisted Synthesis of Hierarchical ZSM-5 Zeolite for Methanol to  
Propylene Reaction: *b*-Oriented Thinner Dimensional Morphology**

Lanlan Zhang,<sup>a</sup> Yu Song,<sup>a</sup> Guodong Li,<sup>a</sup> Qing Zhang,<sup>a</sup> Shaolong Zhang,<sup>a</sup> Jun Xu,<sup>b</sup> Feng  
Deng,<sup>b</sup> and Yanjun Gong<sup>\*a</sup>

## Supplementary Figures

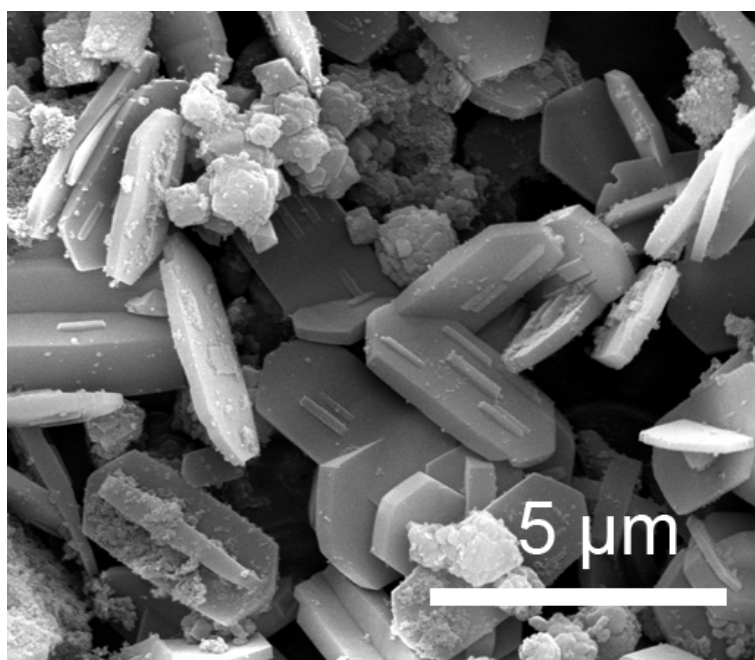

**Figure S1. SEM images of ZSM-5 zeolite synthesized in F medium with  $\text{H}_2\text{O}/\text{SiO}_2 = 20$ .**

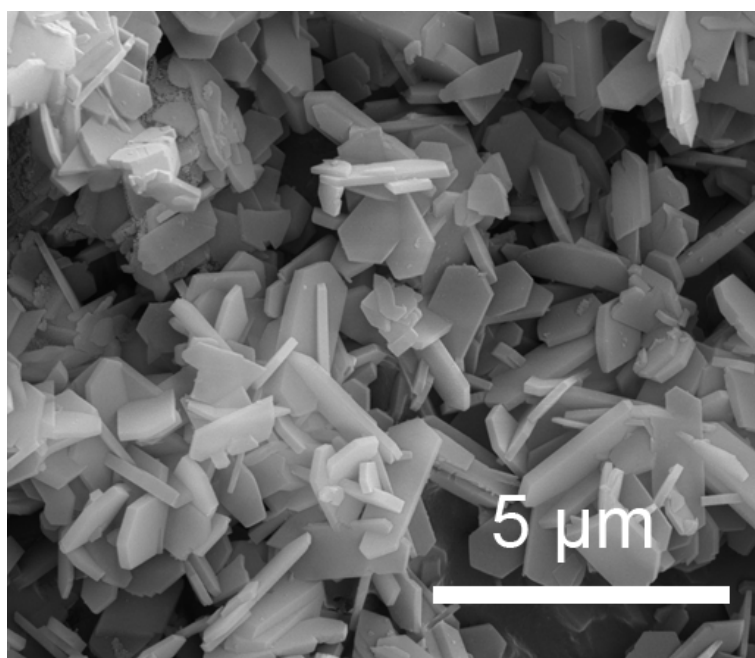

**Figure S2. SEM of ZSM-5 zeolite synthesized in F medium at 453 K.**

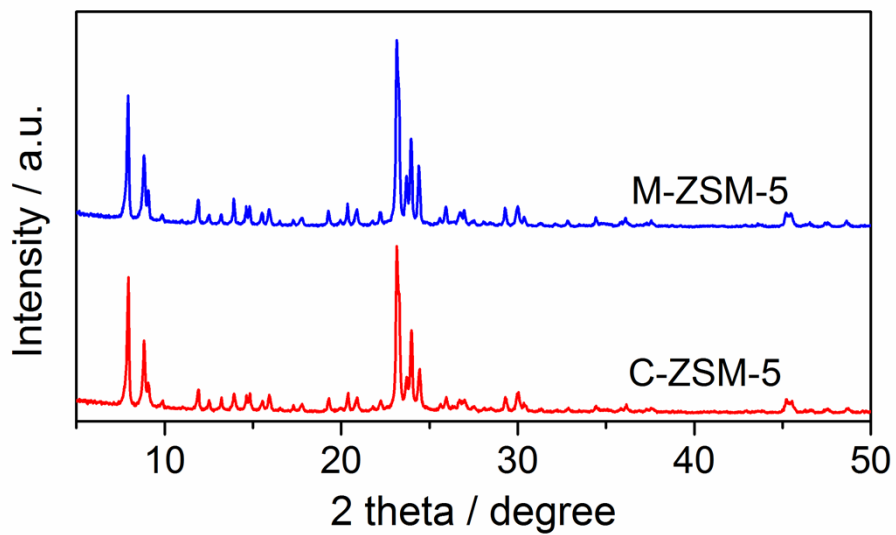

**Figure S3. XRD patterns of ZSM-5 zeolites which synthesized in  $F^-$  and  $OH^-$  medium (M-ZSM-5 and C-ZSM-5).**

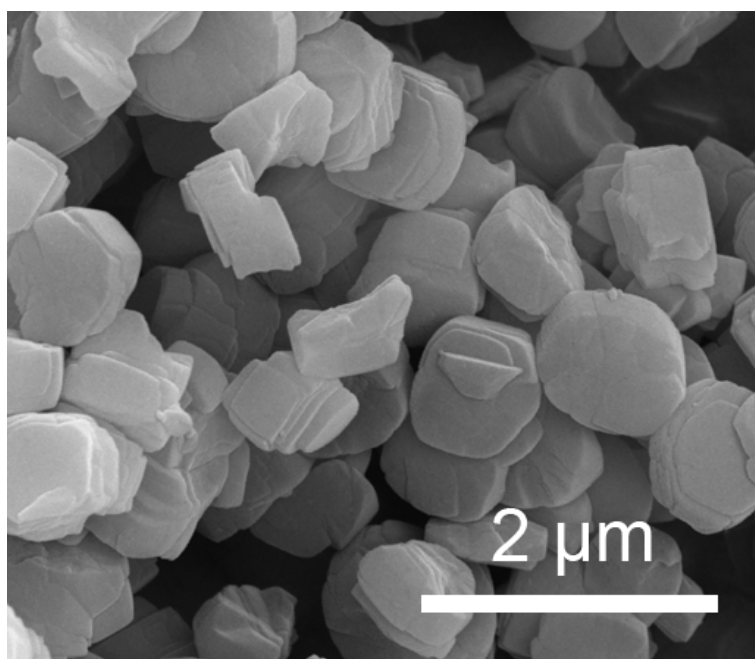

**Figure S4. SEM images of ZSM-5 zeolite synthesized in  $OH^-$  medium.**

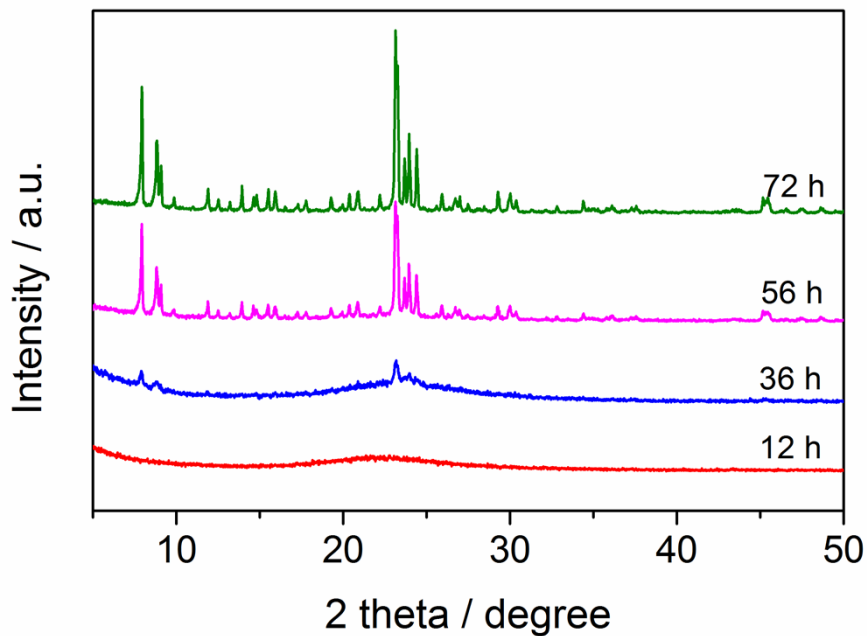

Figure S5. XRD patterns of M-ZSM-5 obtained at different crystallization times.

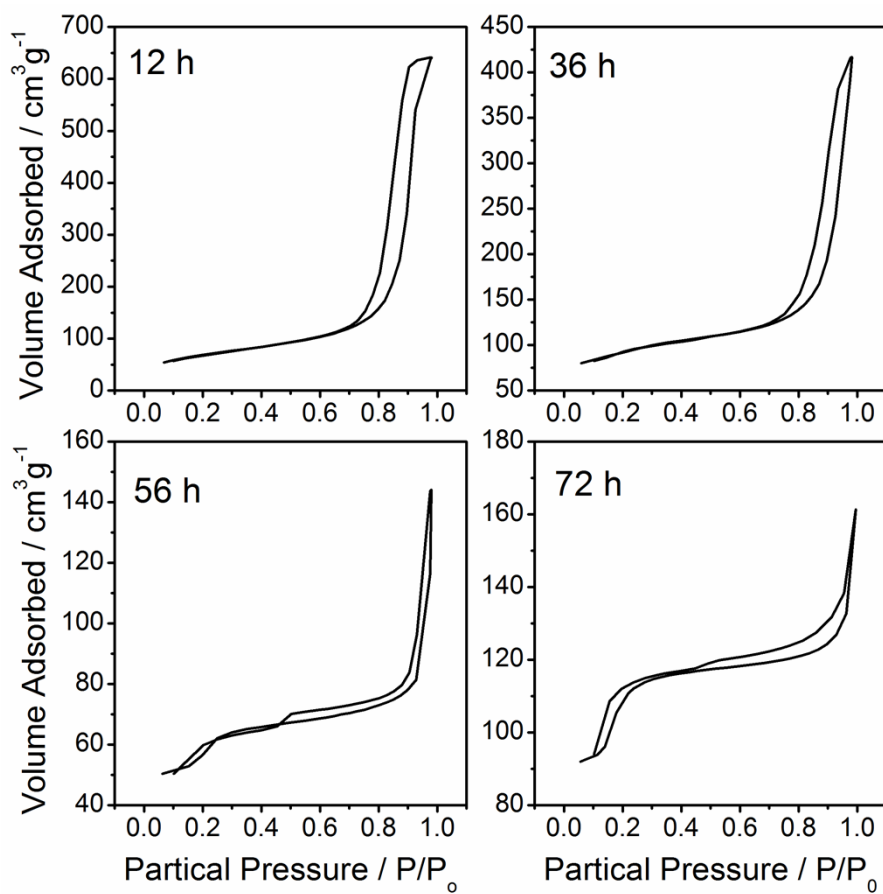

Figure S6.  $N_2$  adsorption/desorption isotherms of M-ZSM-5 obtained at different crystallization times.

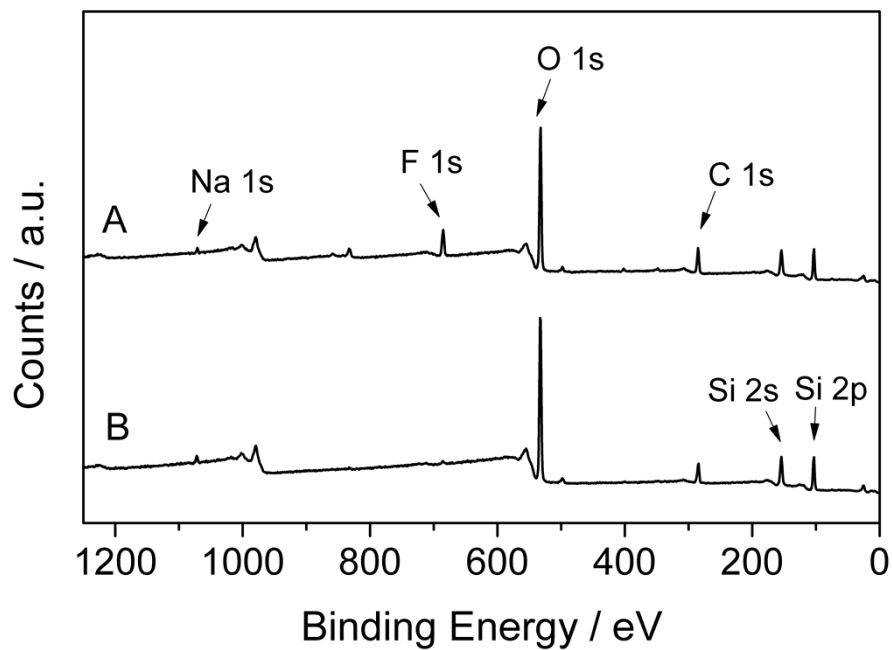

Figure S7. XPS spectra of the M-ZSM-5 sample (A: as-synthesized; B: after calcined).

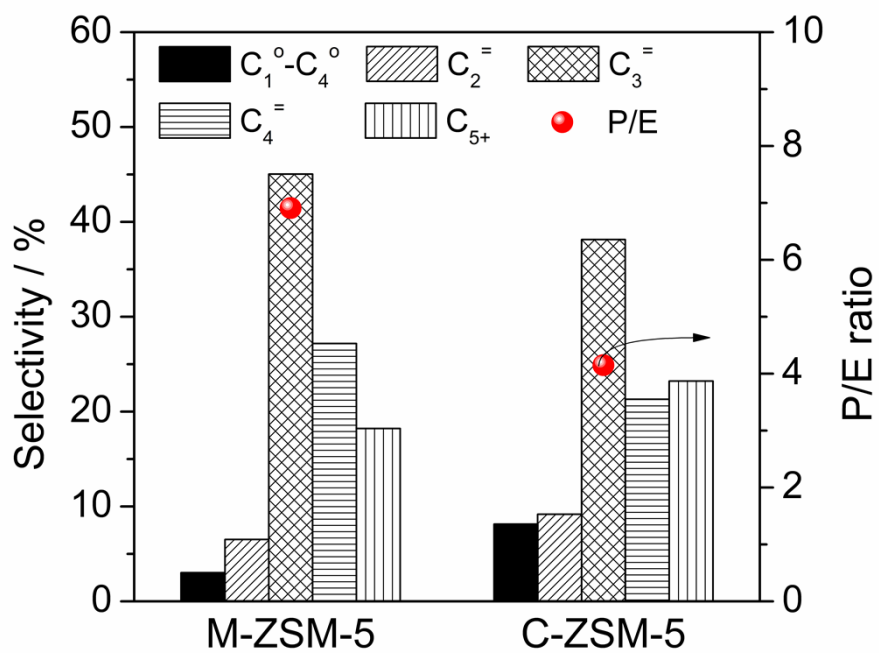

Figure S8. Products distribution at steady stage in MTP conversion over M-ZSM-5 and C-ZSM-5 catalysts. Reaction condition:  $T = 743$  K,  $P = 0.1$  MPa,  $n(\text{CH}_3\text{OH}) : n(\text{H}_2\text{O}) = 1:1$ ,  $WHSV = 3.0$  h<sup>-1</sup>.

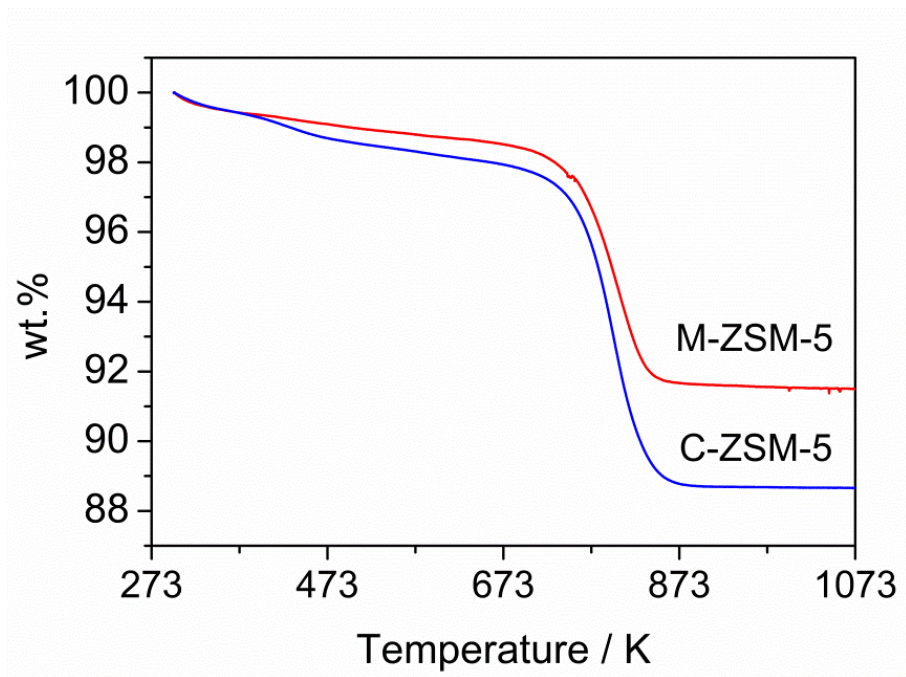

**Figure S9.** Thermogravimetric curves of the deactivated M-ZSM-5 and C-ZSM-5.
